# Supplementary material for: Immune Checkpoint Inhibitor-Mediated Cancer Theranostics with Radiolabeled Anti-Granzyme B Peptide
Source: MDPI journal article supplement (doi:10.3390/pharmaceutics14071460), 2022-07-13
Supplement: s1 [file s1]

# **Immune Checkpoint Inhibitor–mediated Cancer Theranostics with radiolabeled anti-Granzyme B Peptide**

Carolina A. Ferreira<sup>1</sup>, Pedram Heidari<sup>1</sup>, Bahar Ataeinia<sup>1</sup>, Nicoleta Sinevici<sup>1</sup>, Alyssa Granito<sup>1</sup>, Hritik Mahajan Kumar<sup>1</sup>, Eric Wehrenberg-Klee<sup>1</sup>, Umar Mahmood<sup>1\*</sup>

<sup>1</sup> Department of Radiology, Massachusetts General Hospital, Boston, Massachusetts

\*corresponding author: Umar Mahmood, M.D., Ph.D.<sup>1,2,3,4</sup> Department of Radiology<sup>1,2,3,4</sup> Massachusetts General Hospital Boston, MA<sup>1,2,3,4</sup> Tel: 617-726-6477<sup>1,2,3,4</sup> Email: [umahmood@mgh.harvard.edu](mailto:umahmood@mgh.harvard.edu)

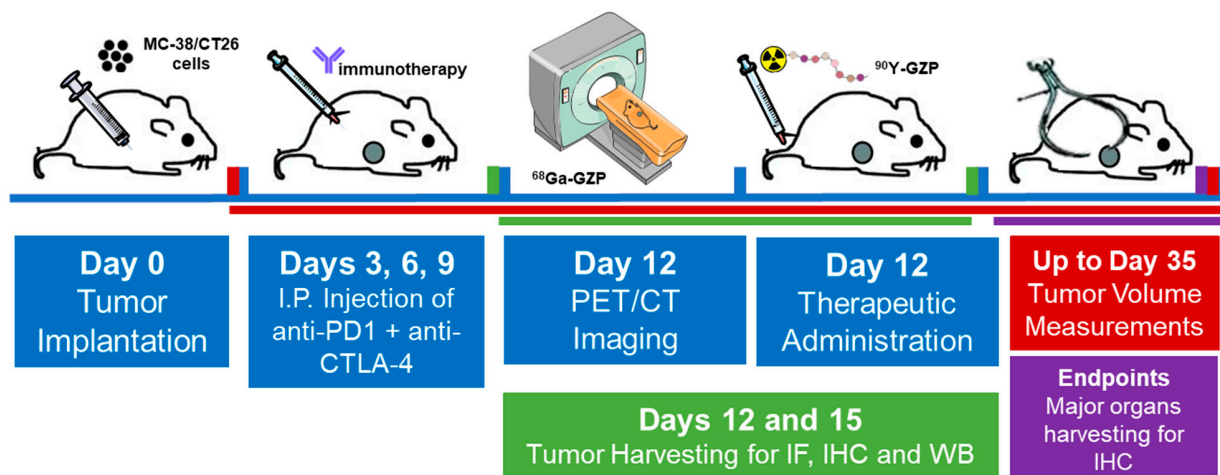

Figure S1. Schematic representation of studies workflow. MC38 and CT26 xenografts were implanted at Day 0. ICI injections were carried out on days 3, 6 and 9.  $^{68}\text{Ga}$ -GZP and PET imaging or  $^{90}\text{Y}$ -GZP for therapy studies were administered on Day 12. Tumor harvesting for IF, IHC and WB was carried out 3 days after last treatment (days 12 or 15).

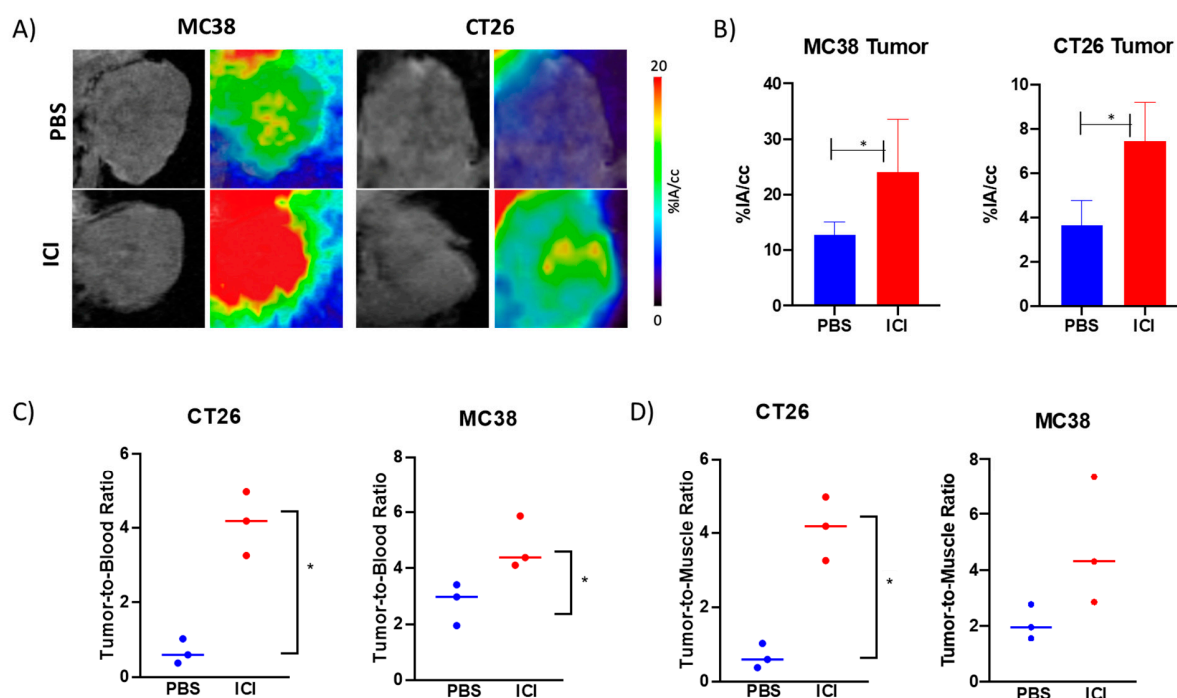

Figure S2. A) PET/MR insert of tumor region and B) ROI values of tumor uptake. C) Tumor-to-blood and D) Tumor-to-Muscle ratios for both tumor models. \*  $p < 0.05$

**Table S1. Groups and Doses for the Therapeutic Study**

| Group                                    | Treatment                                                                | Administration                            | Day of administration                         |
|------------------------------------------|--------------------------------------------------------------------------|-------------------------------------------|-----------------------------------------------|
| PBS                                      | PBS (100μL)                                                              | i.v.                                      | 12                                            |
| ICI                                      | Anti-PD1 (250μg)<br>Anti-CTLA-4 (100μg)                                  | i.p.                                      | 3, 6 and 9                                    |
| ICI + GZP                                | Anti-PD1 (250μg)<br>Anti-CTLA-4 (100μg)<br>GZP                           | i.p. (ICI)<br>i.v. (GZP)                  | 3, 6 and 9 (ICI)<br>12 (GZP)                  |
| ICI + <sup>90</sup> Y-GZP<br>(Low Dose)  | Anti-PD1 (250μg)<br>Anti-CTLA-4 (100μg)<br><sup>90</sup> Y-GZP (2.2MBq)  | i.p. (ICI)<br>i.v. ( <sup>90</sup> Y-GZP) | 3, 6 and 9 (ICI)<br>12 ( <sup>90</sup> Y-GZP) |
| ICI + <sup>90</sup> Y-GZP<br>(High Dose) | Anti-PD1 (250μg)<br>Anti-CTLA-4 (100μg)<br><sup>90</sup> Y-GZP (22.2MBq) | i.p. (ICI)<br>i.v. ( <sup>90</sup> Y-GZP) | 3, 6 and 9 (ICI)<br>12 ( <sup>90</sup> Y-GZP) |
| ICI + <sup>90</sup> Y<br>(High Dose)     | Anti-PD1 (250μg)<br>Anti-CTLA-4 (100μg)<br><sup>90</sup> Y (22.2MBq)     | i.p. (ICI)<br>i.v. ( <sup>90</sup> Y)     | 3, 6 and 9 (ICI)<br>12 ( <sup>90</sup> Y)     |

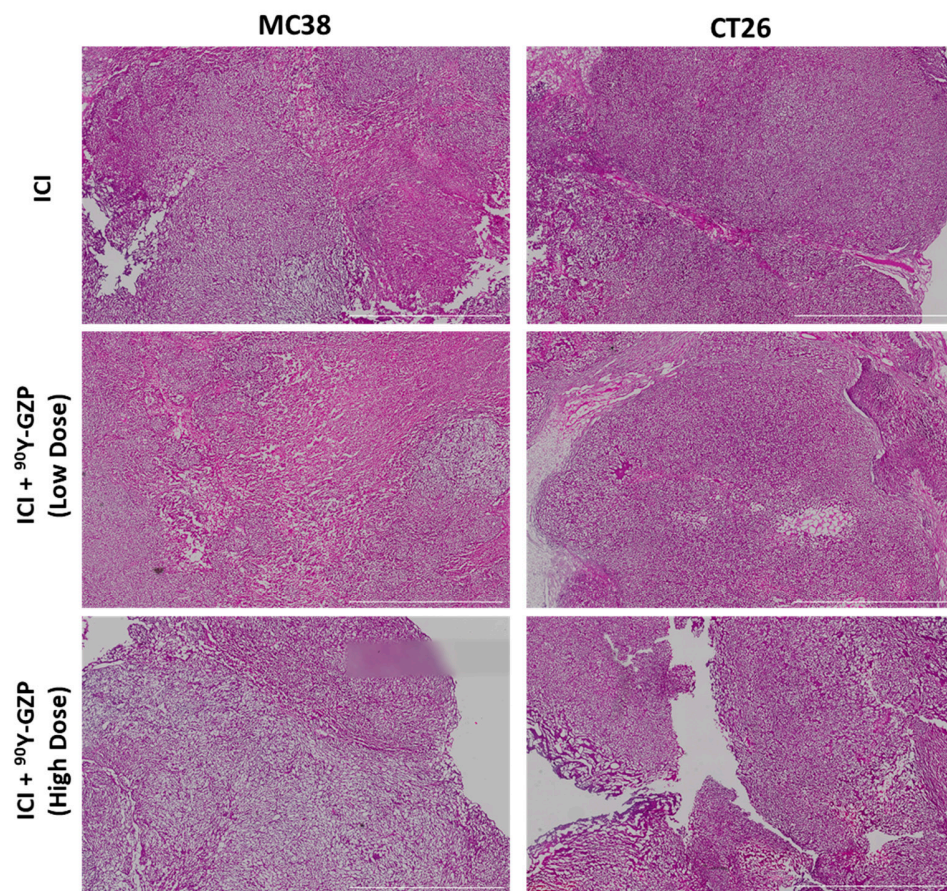

Figure S3. H&E staining of MC38 and CT26 tumor tissue, collected at day 15 demonstrating increased necrotic areas in animals injected with ICI + <sup>90</sup>Y-GZP (high dose).



# CT26

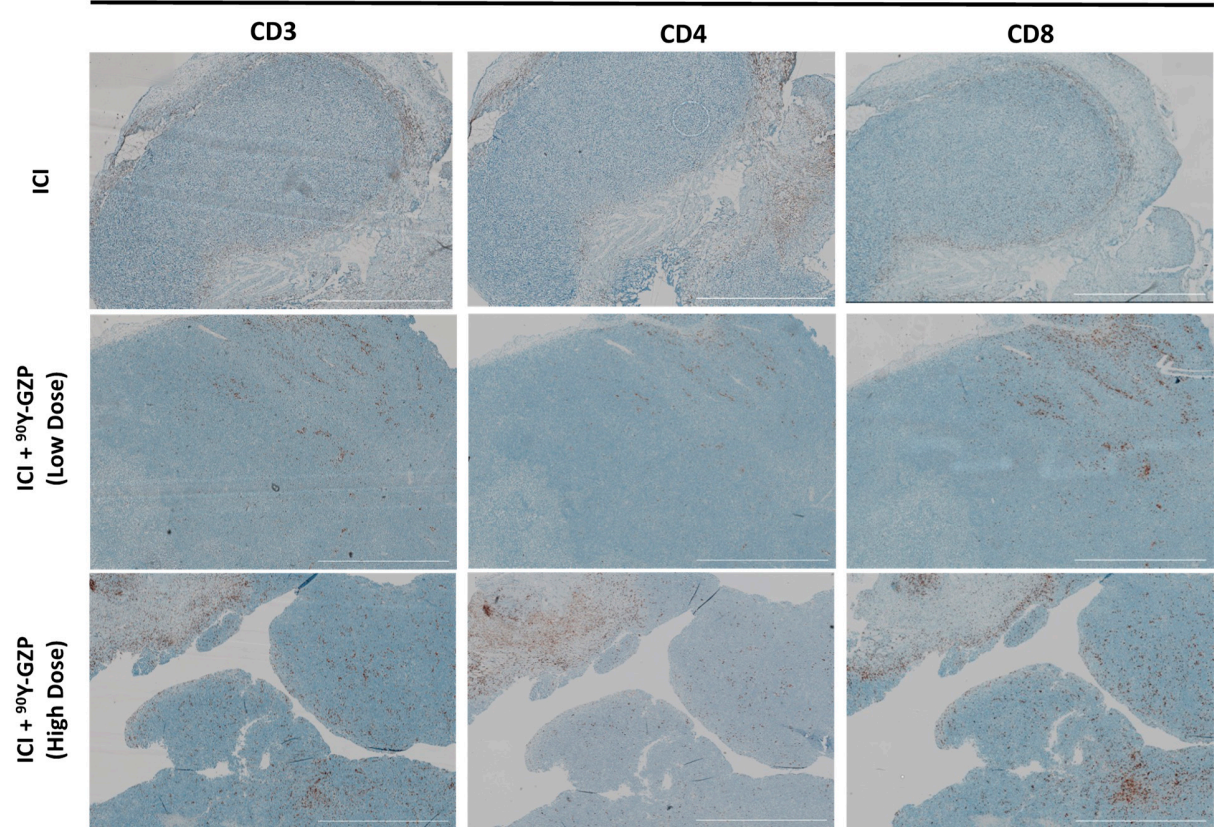

Figure S4. Immunohistochemistry staining of CD3, CD4 and CD8 on CT26 tumor tissue collected 3 days after therapeutic administration (day 12 for ICI and day 15 for ICI + <sup>90</sup>Y-GZP).

# MC38

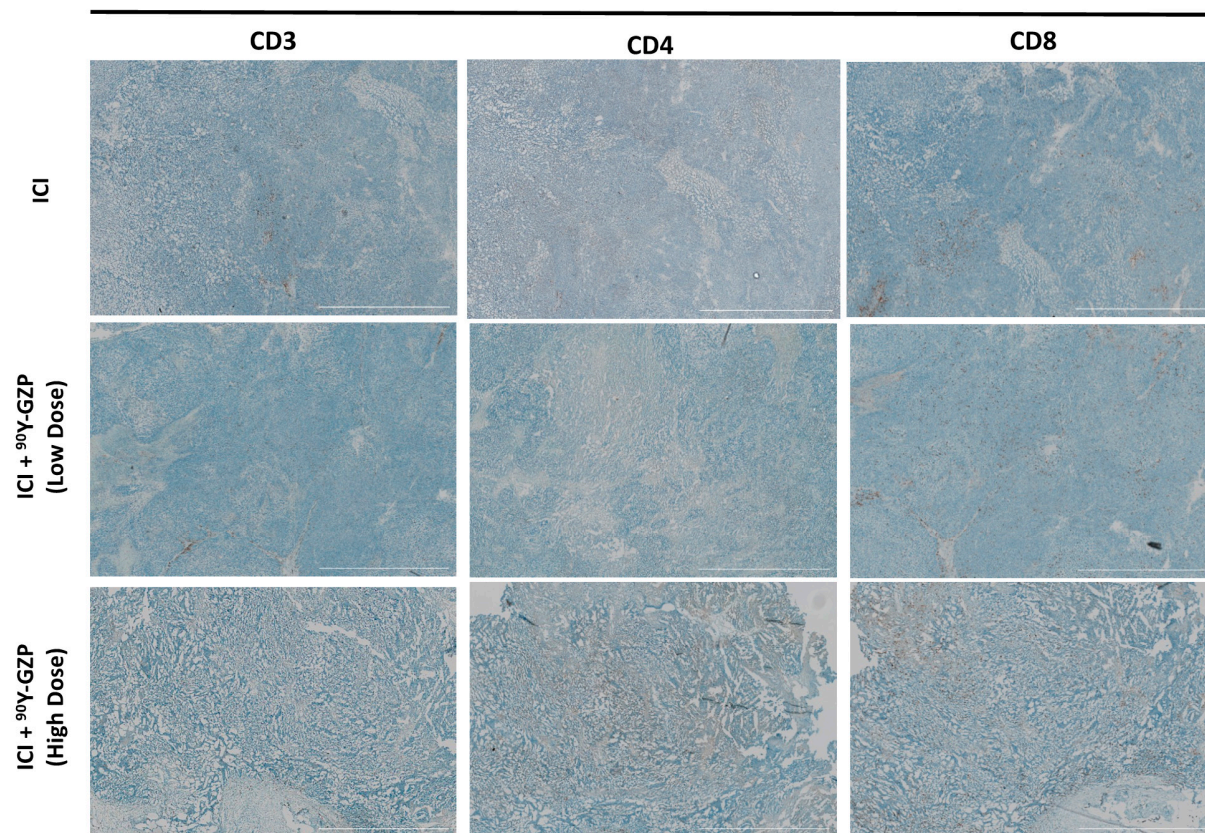

Figure S5. Immunohistochemistry staining of CD3, CD4 and CD8 on MC38 tumor tissue collected 3 days after therapeutic administration (day 12 for ICI and day 15 for ICI + <sup>90</sup>Y-GZP).

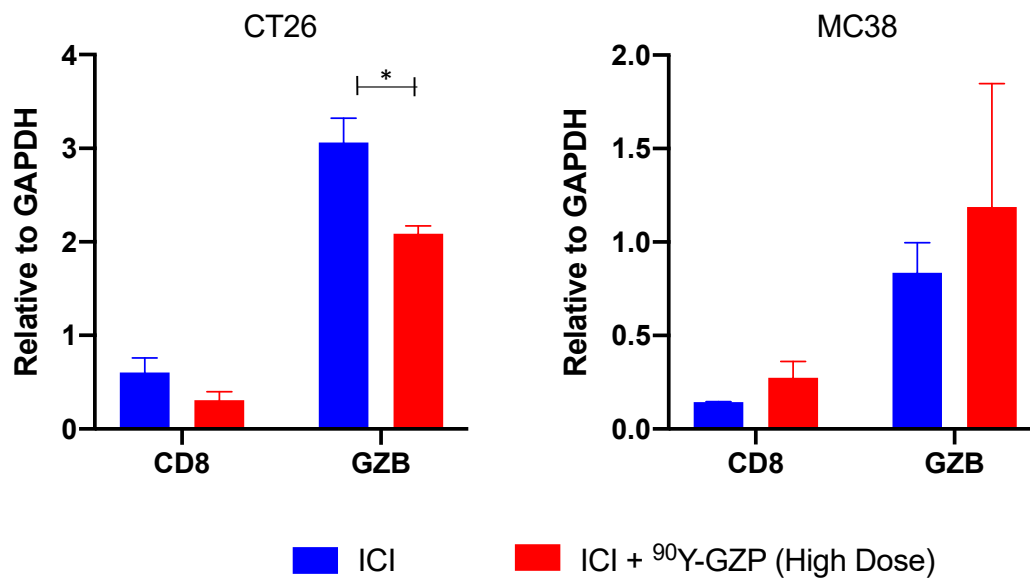

Figure S6. Western Blot quantitative data depicting CD8 and GZB expression in CT26 and MC38 tumor bearing mice that received either ICI or ICI + <sup>90</sup>Y-GZP (High dose). \*p < 0.05

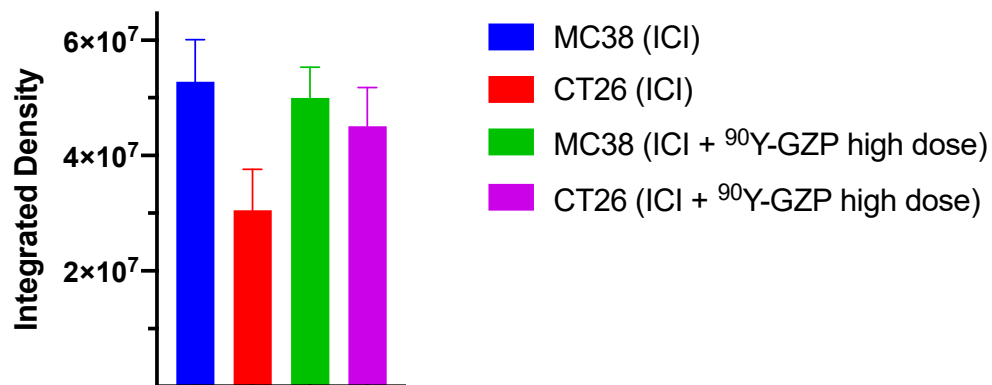

Figure S7. Semi-quantitative analysis of immunofluorescence staining of granzyme B of tumor samples of CT26 and MC38 tumor bearing mice after ICI and ICI + <sup>90</sup>Y-GZP high dose.

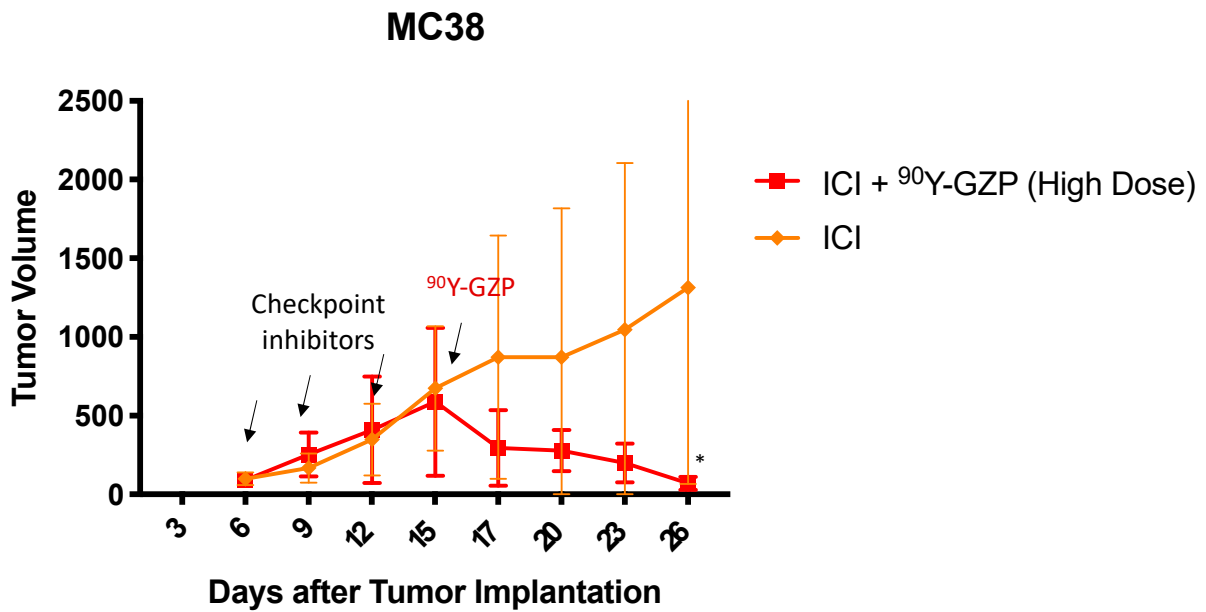

Figure S8. Tumor Growth Curves of MC38 tumor bearing mice after administration of the different therapeutic groups. Checkpoint inhibitors were given days 6, 9 and 12 after tumor implantation and <sup>90</sup>Y-GZP was given on day 15 (indicated by arrows). \*Statistically significant than all the other groups ( $p < 0.05$ ).
